# Supplementary material for: A stable electrolyte makes a nonaqueous Li–O2 battery truly rechargeable
Source: Royal Society of Chemistry journal article supplement (doi:10.1039/c3nj00461a), 2013-01-01
Supplement: c3nj00461a.pdf [file c3nj00461a.pdf]

## **This file includes:**

Materials and Methods

Figs. S1 to S7

Table 1

Full Reference List

## **Materials and Methods**

### **Materials.**

Agate mortar, precision disc cutter, compact tape casting film coater with dryer, electric precision 4" width rolling press with dual micrometer, argon-filled glove box and argon tank, lithium tablets, electrolytes, micropipette, button battery box set, battery separator, compact hydraulic crimping machine, disassembling machine, etc (Figure S1). Electrolyte solvents are gamma-butyrolactone, dimethylsulfoxide (DMSO) and sulfolane. Electrolyte salt is 1 M LiPF<sub>6</sub>. The composition of the carbon cathodes are Ketjen black (KB) carbon:polytetrafluoroethylene (PTFE):Cu 8:1:1 (m/m) or KB carbon:PTFE 9:1 (m/m) in this work.

### **Methods.**

**Carbon electrode preparation.** Ketjen black (KB) carbon EC600JD (Akzo Nobel Corp ~1400 m<sup>2</sup>/g) was dried at 80 °C for 0.5 h then a certain amount of KB, Teflon PTFE and conductive Cu powder (as conductive agent). fluoropolymer resin aqueous dispersion (60% solid) and NMP were blended with a pestle and mortar (Figure S1). The slurry was cast onto carbon paper to make carbon electrode sheet. Then the sheet was heated at 80 °C for 3 h to remove NMP. Electric precision 4" width rolling press with dual micrometer (purchased from MTI Shenzhen Corp.) was used to planish carbon electrode sheet (Figure S1). The composition of the carbon cathode is Ketjen black (KB) carbon:polytetrafluoroethylene (PTFE):Cu 8:1:1 (m/m). In the 110 cycles test, Cu is not used so the the composition of the carbon cathode is Ketjen black (KB) carbon:polytetrafluoroethylene (PTFE) 9:1 (m/m).

**Constructing and testing.** Li-O<sub>2</sub> cells were constructed in an argon-filled glove box (MBraun) in which the oxygen and moisture concentration were both less than 5 ppm (Figure S1). Type 2032 coin cell kits (purchased from MTI Shenzhen Corp.) with a diameter of 20 mm and a thickness of 3.2 mm were used to assemble our batteries. The positive pans of the coin cells were scattered by apertures with a diameter of 1 mm, these holes can allow oxygen to pass through. A lithium disk (15 mm in diameter and 1 mm thick) was used as the anode. The salt and solvent used in the electrolyte were all battery-grade materials purchased from Shenzhen Capchem technology Co.Ltd.. In order to absorb more electrolyte for our Li-O<sub>2</sub> batteries, a Whatman GF/D glass microfiber filter paper (19 mm in diameter) was chosen as the separator. The schematic structure of assembled coin cells is shown in Figure S2. In order to avoid any negative effects of humidity and CO<sub>2</sub>, the coin cells were tested in a closed box filled with oxygen (99.999% in purity). Discharge performance tests were carried out using a CT2001A battery tester (Figure S3).

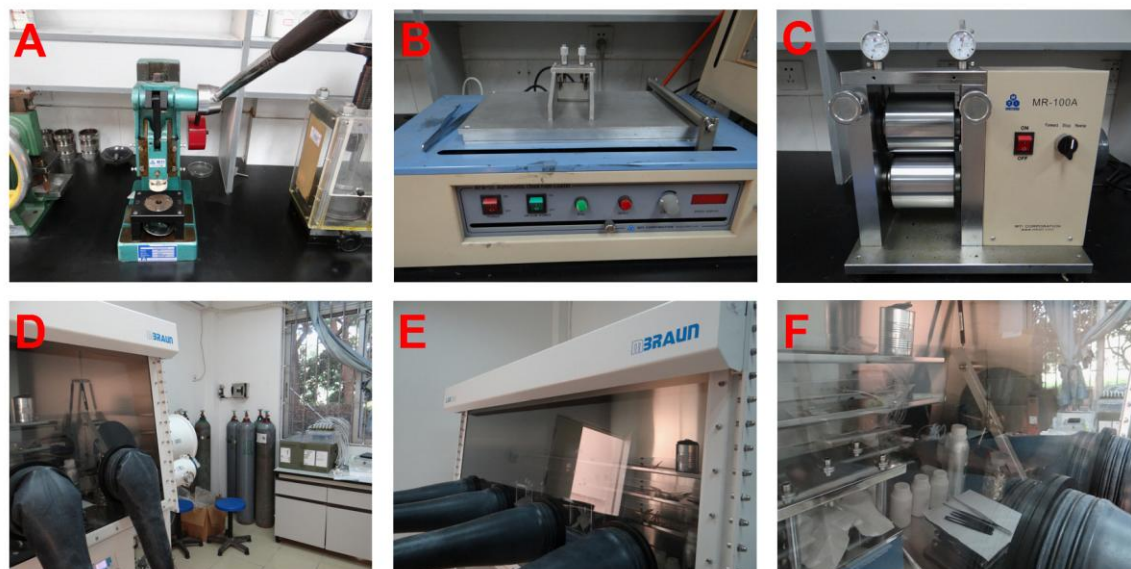

**Figure S1. Main devices, materials, and battery assembly methods.** (A) Agate mortar is used to triturate carbon electrode materials, an precision disc cutter is used to shape carbon electrode sheet. (B) Compact tape casting film coater with dryer is applied to coat carbon electrode materials onto carbon paper to make carbon electrode sheet. (C) Electric precision 4" width rolling press with dual micrometer is used to planish carbon electrode sheet. (D) Argon-filled glove box and argon tank. (E) Lithium tablets are stored in the glove box. (F) Lithium tablets, electrolytes, micropipette, button battery box set, battery separator, compact hydraulic crimping machine, disassembling machine, etc.

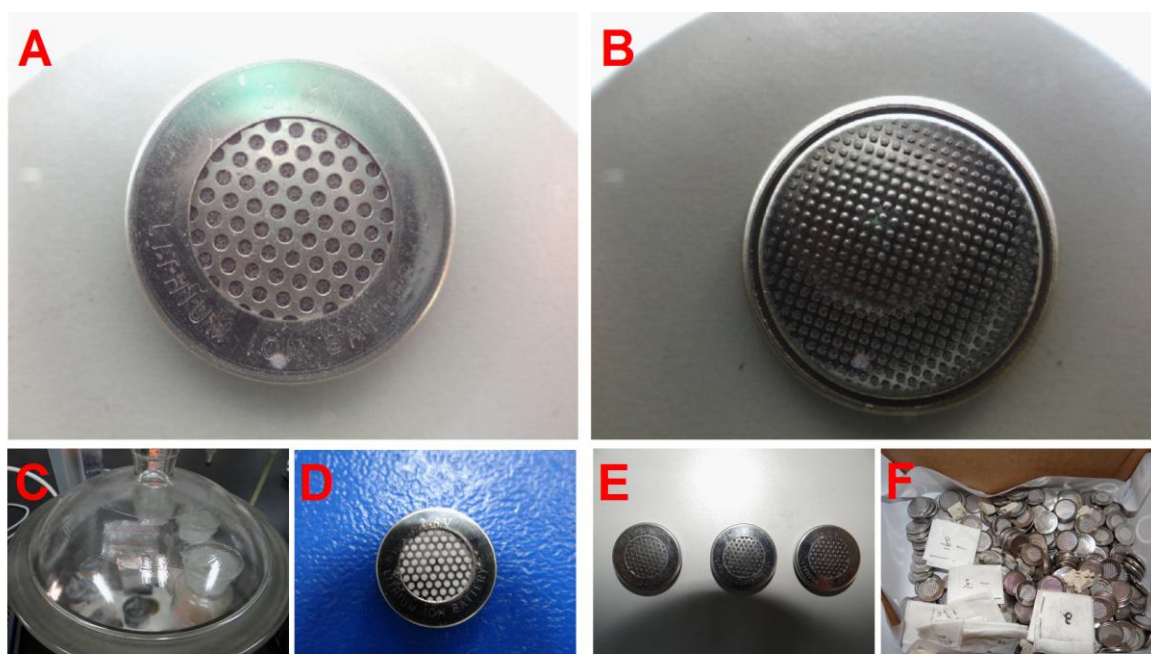

**Figure S2. Constructed Li-air batteries.** (A) Positive electrode. (B) Negative electrode. (C) Carbon electrode materials. (D)~(F) Li-air battery samples.

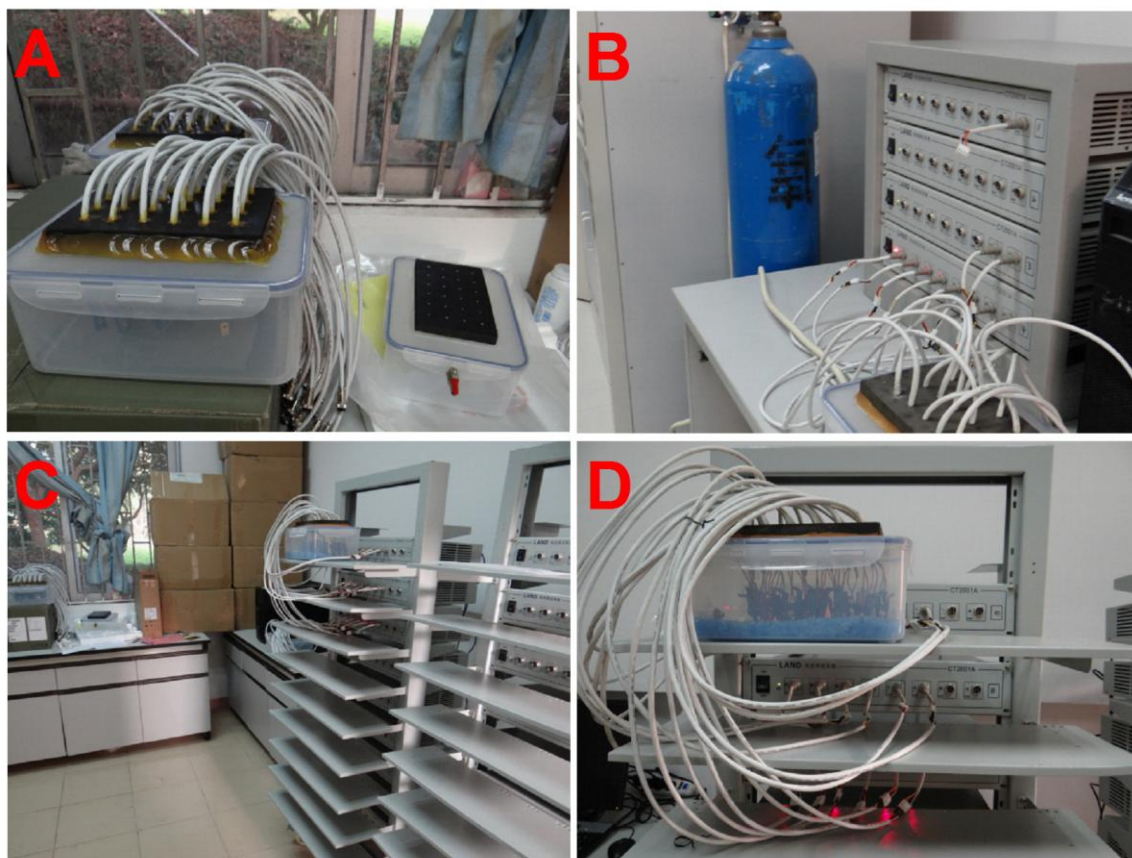

**Figure S3. Testing of Li-air batteries.** (A) Testing boxes of Li-air batteries. (B) Li-air batteries tested in oxygen-filled box. (C) Testing environment: dry air (left) and ambient air (right). (D) Battery testing process.

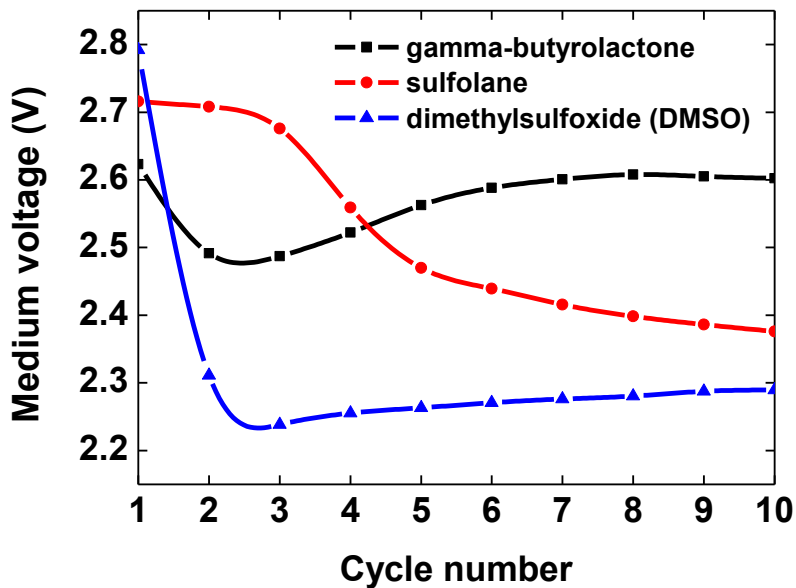

**Figure S4.** Medium voltage comparison of cells composed of three different electrolyte solvent. (A) gamma-butyrolactone , (B) sulfolane , (C) dimethylsulfoxide (DMSO). The current densities and carbon cathode composition here are identical with that of Fig. 1.

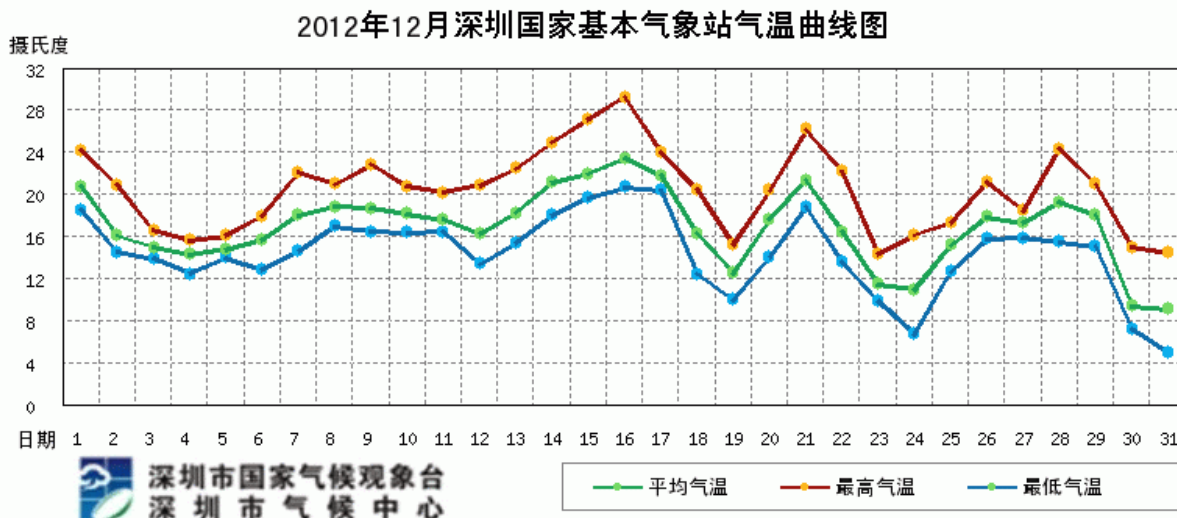

**Figure S5.** Temperature data. Horizontal and vertical ordinates represent date and Celsius degree respectively. Green, red and blue represent the average, highest and lowest air temperature respectively. [Courtesy of Meteorological Bureau of Shenzhen Municipality.]

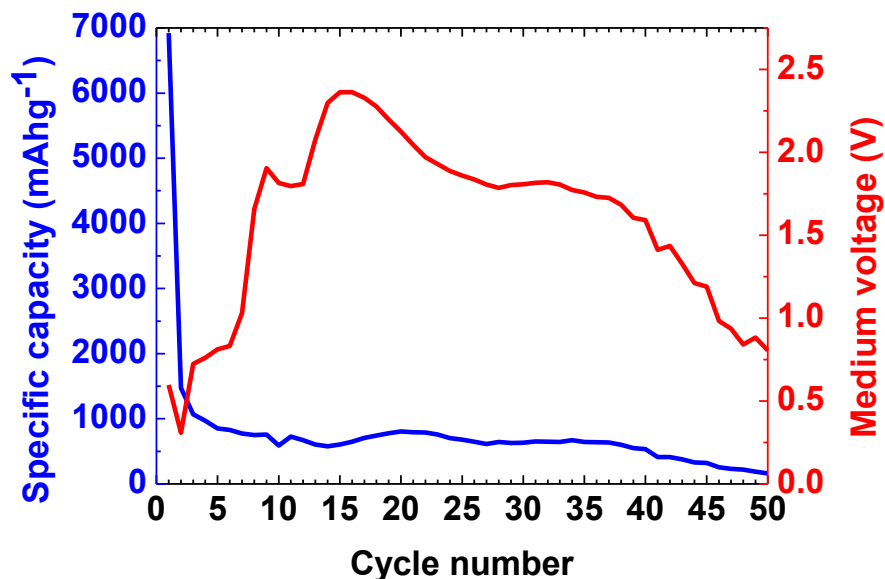

**Figure S6.** Testing result of sulfolane based Li-O<sub>2</sub> cell which was in dry air (5 °C~25 °C) at ~200 mA<sub>g</sub><sup>-1</sup>. Capacity-cycle curve (blue) and voltage-cycle curve (red). The bottom of the testing box



was carpeted with desiccant to make dry condition. Different from the aforementioned, the specific capacity here is normalized by the mass of  $\text{Li}_2\text{O}_2$ .

The main reactions in the Sulfolane based Li-air batteries can be illustrated as follows:

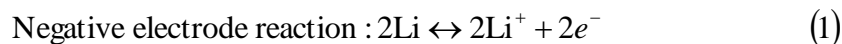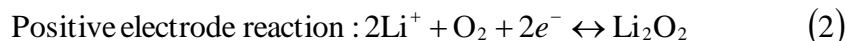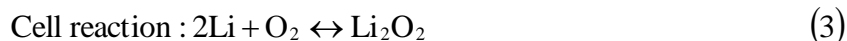

" $\rightarrow$ " represents discharge reaction, " $\leftarrow$ " represents charge reaction.

**Table S1 Testing result of sulfolane based Li- $\text{O}_2$  cell which was in dry air.**

The bottom of the testing box was carpeted with desiccant to make dry condition. Specific capacity is normalized by the mass of  $\text{Li}_2\text{O}_2$ .

| Cycle number | Charge specific capacity ( $\text{mAhg}^{-1}$ ) | Discharge specific capacity ( $\text{mAhg}^{-1}$ ) | Efficiency (%) | Discharge medium voltage (V) |
|--------------|-------------------------------------------------|----------------------------------------------------|----------------|------------------------------|
| 1            | -                                               | 6921.8                                             | -              | 0.5965                       |
| 2            | 1263.1                                          | 1473.9                                             | 116.7          | 0.3086                       |
| 3            | 999.6                                           | 1068.8                                             | 106.9          | 0.724                        |
| 4            | 999.7                                           | 970.4                                              | 97.1           | 0.7612                       |
| 5            | 999.6                                           | 852.7                                              | 85.3           | 0.8122                       |
| 6            | 999.7                                           | 829.4                                              | 83             | 0.8315                       |
| 7            | 999.5                                           | 772.4                                              | 77.3           | 1.0313                       |
| 8            | 999.5                                           | 749.1                                              | 75             | 1.6573                       |
| 9            | 999.5                                           | 759.7                                              | 76             | 1.9044                       |
| 10           | 999.5                                           | 589.2                                              | 58.9           | 1.8155                       |
| 11           | 999.6                                           | 727.5                                              | 72.8           | 1.7956                       |
| 12           | 999.7                                           | 671.9                                              | 67.2           | 1.808                        |
| 13           | 999.7                                           | 606.3                                              | 60.6           | 2.0771                       |
| 14           | 999.6                                           | 579.2                                              | 57.9           | 2.2972                       |
| 15           | 999.7                                           | 603.2                                              | 60.3           | 2.3626                       |
| 16           | 999.7                                           | 648.5                                              | 64.9           | 2.363                        |
| 17           | 999.6                                           | 706.9                                              | 70.7           | 2.3284                       |
| 18           | 999.5                                           | 742.9                                              | 74.3           | 2.2767                       |
| 19           | 999.5                                           | 779.3                                              | 78             | 2.1981                       |
| 20           | 999.6                                           | 807                                                | 80.7           | 2.1252                       |
| 21           | 999.5                                           | 792.8                                              | 79.3           | 2.0454                       |
| 22           | 999.6                                           | 790.2                                              | 79             | 1.9709                       |
| 23           | 999.5                                           | 757.2                                              | 75.8           | 1.9293                       |
| 24           | 999.5                                           | 703.5                                              | 70.4           | 1.888                        |
| 25           | 997.8                                           | 679.2                                              | 68.1           | 1.8591                       |
| 26           | 995                                             | 647.3                                              | 65.1           | 1.8366                       |
| 27           | 986.3                                           | 613.7                                              | 62.2           | 1.8059                       |
| 28           | 989.5                                           | 644                                                | 65.1           | 1.7862                       |
| 29           | 995.4                                           | 630.2                                              | 63.3           | 1.8028                       |

|    |       |       |      |        |
|----|-------|-------|------|--------|
| 30 | 997.2 | 631.1 | 63.3 | 1.8069 |
| 31 | 999.6 | 651.8 | 65.2 | 1.8163 |
| 32 | 999.6 | 646.7 | 64.7 | 1.8196 |
| 33 | 999.5 | 643.3 | 64.4 | 1.8049 |
| 34 | 999.5 | 673.3 | 67.4 | 1.7728 |
| 35 | 999.6 | 643.5 | 64.4 | 1.757  |
| 36 | 999.5 | 641.2 | 64.1 | 1.7318 |
| 37 | 999.5 | 638.3 | 63.9 | 1.7256 |
| 38 | 998.1 | 602.3 | 60.3 | 1.6841 |
| 39 | 988.8 | 550.7 | 55.7 | 1.6044 |
| 40 | 982.9 | 533.2 | 54.2 | 1.5914 |
| 41 | 997.4 | 413.3 | 41.4 | 1.4122 |
| 42 | 966.4 | 413.4 | 42.8 | 1.4358 |
| 43 | 952.6 | 378.5 | 39.7 | 1.327  |
| 44 | 955.7 | 331.8 | 34.7 | 1.2108 |
| 45 | 647.7 | 323.6 | 50   | 1.1891 |
| 46 | 957.1 | 255.7 | 26.7 | 0.9837 |
| 47 | 878.3 | 233.5 | 26.6 | 0.9371 |
| 48 | 716.4 | 219   | 30.6 | 0.8408 |
| 49 | 609   | 190.1 | 31.2 | 0.883  |
| 50 | 688.7 | 159.6 | 23.2 | 0.8055 |

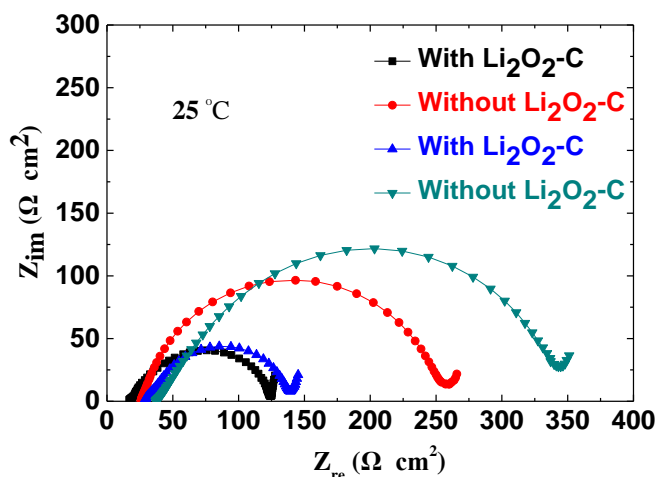

**Figure S7.** A.C. Impedance comparison. The open circuit potential of the batteries with  $\text{Li}_2\text{O}_2\text{-C}$  (lithium peroxide and KB carbon) is about 2.9 V and the real part of A.C. Impedance is about  $135 \Omega \text{ cm}^2$  before the first discharge. The open circuit potential of the batteries without  $\text{Li}_2\text{O}_2\text{-C}$  is about 2.7 V and the real part of A.C. Impedance is about  $300 \Omega \text{ cm}^2$  before the first discharge.

#### References and Notes:

1. J.-M. Tarascon, M. Armand, Issues and challenges facing rechargeable lithium batteries. *Nature* **414**, 359-367 (2001). [doi:10.1038/35104644](https://doi.org/10.1038/35104644)

2. S. D. Beattie, D. M. Manolescu, S. L. Blair, High-capacity lithium-air cathodes. *J. Electrochem. Soc.* **156**, A44-A47 (2009). doi: [10.1149/1.3005989](https://doi.org/10.1149/1.3005989)
3. G. Girishkumar, B. McCloskey, A. C. Luntz, S. Swanson, W. Wilcke, Lithium-air battery: promise and challenges. *J. Phys. Chem. Lett.* **1**, 2193-2203 (2010). doi: [10.1021/jz1005384](https://doi.org/10.1021/jz1005384)
4. K. M. Abraham, Z. Jiang, A polymer electrolyte-based rechargeable lithium/oxygen battery. *J. Electrochem. Soc.* **143**, 1-5 (1996). doi: [10.1149/1.1836378](https://doi.org/10.1149/1.1836378)
5. T. Ogasawara, A. Débart, M. Holzapfel, P. Novák, P. G. Bruce, Rechargeable Li<sub>2</sub>O<sub>2</sub> electrode for lithium batteries. *J. Am. Chem. Soc.* **128**, 1390-1393 (2006). doi: [10.1021/ja056811q](https://doi.org/10.1021/ja056811q)
6. H.-G. Jung, J. Hassoun, J.-B. Park, Y.-K. Sun, B. Scrosati, An improved high-performance lithium-air battery. *Nat. Chem.* **4**, 579-585 (2012). doi: [10.1038/nchem.1376](https://doi.org/10.1038/nchem.1376)
7. Z. Peng, S. A. Freunberger, Y. Chen, P. G. Bruce, A Reversible and Higher-Rate Li-O<sub>2</sub> Battery. *Science* **337**, 563-566 (2012). doi: [10.1126/science.1223985](https://doi.org/10.1126/science.1223985)
8. B. D. McCloskey, R. Scheffler, A. Speidel, D. S. Bethune, R. M. Shelby, A. C. Luntz, On the efficacy of electrocatalysis in nonaqueous Li-O<sub>2</sub> batteries. *J. Am. Chem. Soc.* **133**, 18038-18041 (2011). doi: [10.1021/ja207229n](https://doi.org/10.1021/ja207229n)
9. B. D. McCloskey, D. S. Bethune, R. M. Shelby, G. Girishkumar, A. C. Luntz, Solvents' critical role in nonaqueous lithium-oxygen battery electrochemistry. *J. Phys. Chem. Lett.* **2**, 1161-1166 (2011). doi: [10.1021/jz200352v](https://doi.org/10.1021/jz200352v)
10. T. Laino, A. Curioni, A new piece in the puzzle of lithium/air batteries: computational study on the chemical stability of propylene carbonate in the presence of lithium peroxide. *Chem. Eur. J.* **18**, 3510-3520 (2012). doi: [10.1002/chem.201103057](https://doi.org/10.1002/chem.201103057)
11. V. Viswanathan, K. S. Thygesen, J. S. Hummelshøj, J. K. Nørskov, G. Girishkumar, B. D. McCloskey, A. C. Luntz, Electrical conductivity in Li<sub>2</sub>O<sub>2</sub> and its role in determining capacity limitations in non-aqueous Li-O<sub>2</sub> batteries. *J. Chem. Phys.* **135**, 214704-1—214704-10 (2011). doi: [10.1063/1.3663385](https://doi.org/10.1063/1.3663385)
12. K. Takechi, S. Higashi, F. Mizuno, H. Nishikoori, H. Iba, T. Shiga, Stability of Solvents against Superoxide Radical Species for the Electrolyte of Lithium-Air Battery. *ECS Electrochem. Lett.* **1**, A27-A29 (2012). doi: [10.1149/2.010201eel](https://doi.org/10.1149/2.010201eel)
13. N. Kamaya, K. Homma, Y. Yamakawa, M. Hirayama, R. Kanno, M. Yonemura, T. Kamiyama, Y. Kato, S. Hama, K. Kawamoto, A. Mitsui, A lithium superionic conductor. *Nat. Mater.* **10**, 682-686 (2011). doi: [10.1038/nmat3066](https://doi.org/10.1038/nmat3066)
14. J. Adams, M. Karulkar, Bipolar plate cell design for a lithium air battery. *J. Power Sources* **199**, 247-255 (2012). doi: [10.1016/j.jpowsour.2011.10.041](https://doi.org/10.1016/j.jpowsour.2011.10.041)
15. Y. Mo, S. P. Ong, G. Ceder, First-principles study of the oxygen evolution reaction of lithium peroxide in the lithium-air battery. *Phys. Rev. B* **84**, 205446-1—205446-9 (2011). doi: [10.1103/PhysRevB.84.205446](https://doi.org/10.1103/PhysRevB.84.205446)
16. A. Garsuch, D. M. Badine, K. Leitner, L. H. S. Gasparotto, N. Borisenko, F. Endres, M. Vracar, J. Janek, R. Oesten, Investigation of various ionic liquids and catalyst materials for lithium-oxygen batteries. *Z. Phys. Chem.* **225**, 1-13 (2011) doi: [10.1524/zpch.2011.0136](https://doi.org/10.1524/zpch.2011.0136)

17. S. Meini, M. Piana, N. Tsiouvaras, A. Garsuch, H. A. Gasteiger, The effect of water on the discharge capacity of a non-catalyzed carbon cathode for Li-O<sub>2</sub> batteries. *Electrochem. and Solid State Lett.* **15**, A45-A48 (2012). doi: [10.1149/2.005204esl](https://doi.org/10.1149/2.005204esl)
18. Y. Shimonishi, T. Zhang, N. Imanishi, D. Im, D. J. Lee, A. Hirano, Y. Takeda, O. Yamamoto, N. Sammes, A study on lithium/air secondary batteries—stability of the NASICON-type lithium ion conducting solid electrolyte in alkaline aqueous solutions. *J. Power Sources* **196**, 5128-5132 (2011). doi: [10.1016/j.jpowsour.2011.02.023](https://doi.org/10.1016/j.jpowsour.2011.02.023)
19. K. Takahashi, J. Ohmura, D. Im, D. J. Lee, T. Zhang, N. Imanishi, A. Hirano, M. B. Phillipps, Y. Takeda, O. Yamamoto, A super high lithium ion conducting solid electrolyte of grain boundary modified Li<sub>1.4</sub>Ti<sub>1.6</sub>Al<sub>0.4</sub>(PO<sub>4</sub>)<sub>3</sub>. *J. Electrochem. Soc.* **159**, A342-A348 (2012). doi: [10.1149/2.018204jes](https://doi.org/10.1149/2.018204jes)
20. J. Christensen, P. Albertus, R. S. Sanchez-Carrera, T. Lohmann, B. Kozinsky, R. Liedtke, J. Ahmed, A. Kojic, A critical review of Li/air batteries. *J. Electrochem. Soc.* **159**, R1-R30 (2012). doi: [10.1149/2.086202jes](https://doi.org/10.1149/2.086202jes)
21. F. Wang, C.-S. Liang, D.-L. Xu, H.-Q. Cao, H.-Y. Sun, Z.-K. Luo, Research progress of Lithium-air battery. *J. Inorg. Mater.* **27**, 1233-1242 (2012). doi: [10.3724/SP.J.1077.2012.12111](https://doi.org/10.3724/SP.J.1077.2012.12111)
22. Materials and methods are available as supplementary materials online.
23. U. Tilstam, Sulfolane: a versatile dipolar aprotic solvent. *Org. Process Res. Dev.* **16**, 1273-1278 (2012). doi: [10.1021/op300108w](https://doi.org/10.1021/op300108w)
24. V. S. Bryantsev, V. Giordani, W. Walker, M. Blanco, S. Zecevic, K. Sasaki, J. Uddin, D. Addison, G. V. Chase, Predicting solvent stability in aprotic electrolyte Li-air batteries: nucleophilic substitution by the superoxide anion radical (O<sub>2</sub><sup>•-</sup>). *J. Phys. Chem. A* **115**, 12399-12409 (2011). doi: [10.1021/jp2073914](https://doi.org/10.1021/jp2073914)
25. D. Xu, Z.-l. Wang, J.-j. Xu, L.-l. Zhang, L.-m. Wang, X.-b. Zhang, A stable sulfone based electrolyte for high performance rechargeable Li-O<sub>2</sub> batteries. *Chem. Commun.* **48**, 11674-11676 (2012). doi: [10.1039/c2cc36815c](https://doi.org/10.1039/c2cc36815c)
26. K. Xu, Nonaqueous liquid electrolytes for lithium-based rechargeable batteries. *Chem. Rev.* **104**, 4303-4417 (2004). doi: [10.1021/cr030203g](https://doi.org/10.1021/cr030203g)
27. W. Xu, V. V. Viswanathan, D. Wang, S. A. Towne, J. Xiao, Z. Nie, D. Hu, J.-G. Zhang, Investigation on the charging process of Li<sub>2</sub>O<sub>2</sub>-based air electrodes in Li-O<sub>2</sub> batteries with organic carbonate electrolytes. *J. Power Sources* **196**, 3894-3899 (2011). doi: [10.1016/j.jpowsour.2010.12.065](https://doi.org/10.1016/j.jpowsour.2010.12.065)
28. J. Xiao, J. Hu, D. Wang, D. Hu, W. Xu, G. L. Graff, Z. Nie, J. Liu, J.-G. Zhang, Investigation of the rechargeability of Li-O<sub>2</sub> batteries in non-aqueous electrolyte. *J. Power Sources* **196**, 5674-5678 (2011). doi: [10.1016/j.jpowsour.2011.02.060](https://doi.org/10.1016/j.jpowsour.2011.02.060)
29. W. Xu, K. Xu, V. V. Viswanathan, S. A. Towne, J. S. Hardy, J. Xiao, Z. Nie, D. Hu, D. Wang, J.-G. Zhang, Reaction mechanisms for the limited reversibility of Li-O<sub>2</sub> chemistry in organic carbonate electrolytes. *J. Power Sources* **196**, 9631-9639 (2011). doi: [10.1016/j.jpowsour.2011.06.099](https://doi.org/10.1016/j.jpowsour.2011.06.099)



30. S. A. Freunberger, Y. Chen, Z. Peng, J. M. Griffin, L. J. Hardwick, F. Bard  $\acute{e}$  P. Nov  $\acute{a}$ k, P. G. Bruce, Reactions in the rechargeable lithium-O<sub>2</sub> battery with alkyl carbonate electrolytes. *J. Am. Chem. Soc.* **133**, 8040-8047 (2011). [doi: 10.1021/ja2021747](https://doi.org/10.1021/ja2021747)
31. C. O. Laoire, S. Mukerjee, K. M. Abraham, Influence of nonaqueous solvents on the electrochemistry of oxygen in the rechargeable lithium-air battery. *J. Phys. Chem. C* **114**, 9178-9186 (2010). [doi: 10.1021/jp102019y](https://doi.org/10.1021/jp102019y)
32. B. D. McCloskey, D. S. Bethune, R. M. Shelby, T. Mori, R. Sche ffler, A. Speidel, M. Sherwood, A. C. Luntz, Limitations in rechargeability of Li-O<sub>2</sub> batteries and possible origins. *J. Phys. Chem. Lett.* **3**, 3043-3047 (2012). [doi: 10.1021/jz301359t](https://doi.org/10.1021/jz301359t)
33. B. Dunn, H. Kamath, J.-M. Tarascon, Electrical energy storage for the grid: a battery of choices. *Science* **334**, 928-935 (2011). [doi: 10.1126/science.1212741](https://doi.org/10.1126/science.1212741)
